# Supplementary material for: Destruction of perfluoroalkyl surfactant aggregates by β-cyclodextrin
Source: Royal Society of Chemistry journal article supplement (doi:10.1039/b315681h), 2004-01-01
Supplement: b315681h.doc [file b315681h.doc]

**Destruction of perfluoroalkyl surfactant aggregates by -cyclodextrin**

Gaëlle M. Nicolle and André E. Merbach*

Laboratory of Inorganic and Bioinorganic Chemistry, Swiss Federal Institute of Technology EPFL-BCH, CH-1015 Lausanne, Switzerland.

**Supplementary informations**

**Equation S1.** 2  2 exchange matrix D

**Figure S1.** Temperature dependence of the demicellisation rate (*i.e.* of the 1:1 inclusion complex formation rate), *k*, studied by 19F NMR at 400 MHz on the fluorines of YIII perfluoroalkyl surfactant.

**Table S1.** Demicellisation rate, *k*, obtained from the simulation of the experimental 400 MHz  19F NMR spectra ofY(III) gadofluorine 8 (for the  19F NMR signal) measured at variable temperature with the formalism of Kubo-Sack and a 2 sites exchange matrix and extrapolated half line width of the  19F NMR signal in the absence of exchange with -CD (1/*T2m*).

**Table S2.** Dependence of the observed longitudinal relaxation rate, R1,obs versus the concentration of gadofluorine 8 (=) at 25°C and 29 MHz.

**Table S3.** Water proton relaxivity, *r1* (in mM-1s-1) of Gd(III) gadofluorine 8 in the presence of -CD as a function of magnetic field and at T = 25 °C.

**Table S4.** Water proton relaxivity, *r1* (in mM-1s-1) of Gd(III) gadofluorine 8 in the absence of -CD as a function of magnetic field and at T = 25 °C.

**Table S5.** Parameters obtained from the fitting of the 1H NMRD data for gadofluorine 8 in the absence and presence of 1 and 2 equivalents of -CD.

**Table S6.** Dependence of the water proton relaxivity, *r1* (in mM-1s-1) of Gd(III) gadofluorine 8 on equivalent of -CD at 40 MHz and at T = 25 °C.

**Equation S1.**

The inverse of the mean lifetime of the fluorines in the micelle, 1/** = *k*, was extracted from the 19F NMR spectra by line shape analysis using the Kubo-Sack formalism with the following 2  2 exchange matrix D (eq 1) [R. Kubo *J. Phys. Soc. Jpn* **1954**, *9*, 888.

R. A. Sack *Mol. Phys.* **1958**, *1*, 163.]

D =

| 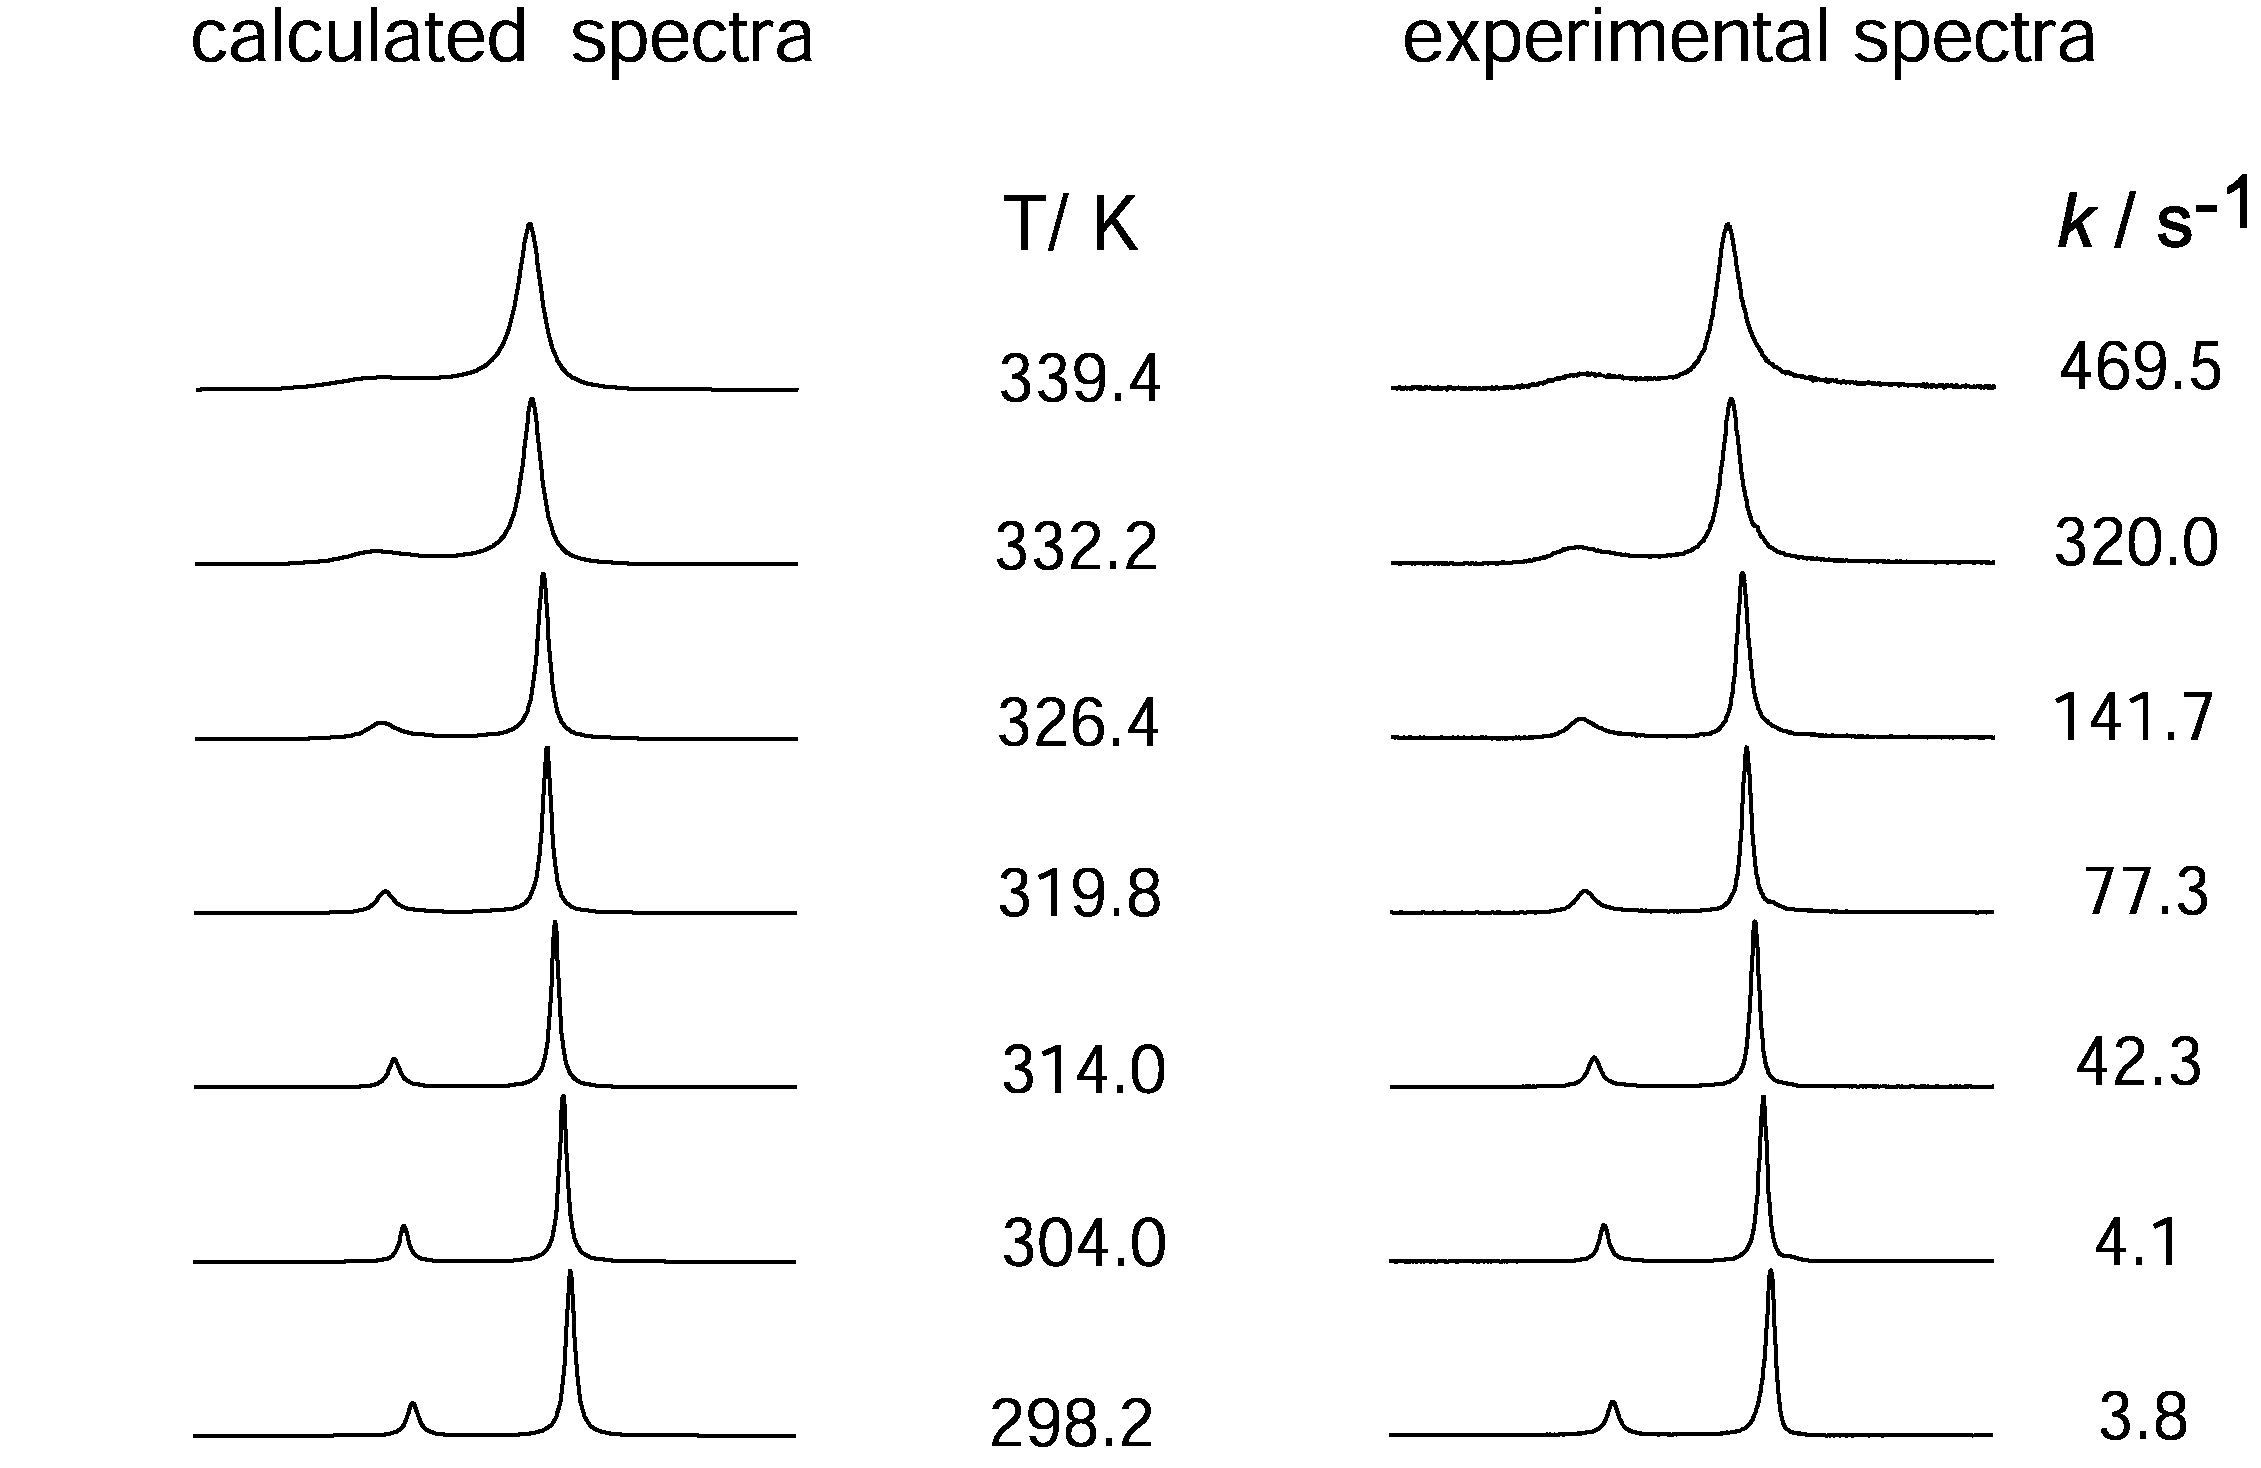 |
| --- |

**Figure S1.** Temperature dependence of the demicellisation rate (*i.e.* of the 1:1 inclusion complex formation rate), *k*, studied by 19F NMR at 400 MHz on the fluorines of YIII perfluoroalkyl surfactant. *C-CD* / *CY* = 0.25 ; *CY* = 8.38 mM. H‡ = 75  8 kJ mol-1. S‡ = + 26  3 J mol-1 K-1.

**Table S1.** Demicellisation rate, *k*, obtained from the simulation of the experimental 400 MHz  19F NMR spectra ofY(III) gadofluorine 8 (for the  19F NMR signal) measured at variable temperature with the formalism of Kubo-Sack and a 2 sites exchange matrix and extrapolated half line width of the  19F NMR signal in the absence of exchange with -CD (1/*T2m*).

| **T / °C** | **k / s-1** | **1/*T2m* / Hz** |
| --- | --- | --- |
| 25.7 | 3.754 | 182.2 |
| 30.8 | 4.05 | 160.2 |
| 40.8 | 42.328 | 126.0 |
| 46.6 | 77.3 | 110.3 |
| 53.2 | 141.7 | 95.4 |
| 59 | 320.84 | 84.4 |
| 66.2 | 469.5 | 72.9 |

**Table S2.** Dependence of the observed longitudinal relaxation rate, R1,obs versus the concentration of gadofluorine 8 (=) at 25°C and 29 MHz.

| **/ mM** | **T1/ms** | **R1,obs** |
| --- | --- | --- |
| *83.3351* | 0.6 | 1797.2 |
| *43.9301* | 1.0 | 984.3 |
| *9.3573* | 5.3 | 187.8 |
| *4.6997* | 10.6 | 94.6 |
| *0.8785* | 66.7 | 15.0 |
| *0.0377* | 1200.0 | 0.8 |
| *0.1283* | 600.0 | 1.7 |
| *0.0033* | 4491.0 | 0.2 |
| *0.0033* | 4000.0 | 0.3 |
| *0.0033* | 3500.0 | 0.3 |
| *0.0009* | 5000.0 | 0.2 |

**Table S3.** Water proton relaxivity, *r1* (in mM-1s-1) of Gd(III) gadofluorine 8 in the presence of 1(a) and 2 (b) equivalents of -CD as a function of magnetic field and at T = 25 °C. (a) = 3.23 mmol dm-3;  (b) = 2.16 mmol dm-3

(a) (b)

| **1H  / MHz** | ***r*1 /** mM**-1s-1** |  | **1H  / MHz** | ***r*1 /** mM**-1s-1** |
| --- | --- | --- | --- | --- |
| 0.01 | 8.23 |  | 0.01 | 10.49 |
| 0.02 | 8.33 |  | 0.02 | 10.69 |
| 0.03 | 8.41 |  | 0.03 | 10.38 |
| 0.06 | 8.18 |  | 0.05 | 10.57 |
| 0.10 | 8.47 |  | 0.09 | 10.22 |
| 0.18 | 8.39 |  | 0.15 | 10.18 |
| 0.32 | 8.16 |  | 0.26 | 10.25 |
| 0.56 | 7.89 |  | 0.45 | 9.85 |
| 1.00 | 7.41 |  | 0.79 | 9.87 |
| 1.78 | 7.06 |  | 1.36 | 9.32 |
| 3.16 | 6.47 |  | 2.34 | 8.92 |
| 5.62 | 6.08 |  | 4.03 | 7.72 |
| 10.00 | 5.55 |  | 6.95 | 7.10 |
| 12.00 | 5.65 |  | 12.00 | 7.31 |
| 14.00 | 5.42 |  | 12.00 | 7.34 |
| 16.00 | 5.28 |  | 14.00 | 7.33 |
| 18.00 | 5.46 |  | 16.00 | 7.06 |
| 20.00 | 5.51 |  | 18.00 | 7.31 |
| 40.00 | 5.83 |  | 20.00 | 7.51 |
|  |  |  | 40.00 | 7.73 |

**Table S4.** Water proton relaxivity, *r1* (in mM-1s-1) of Gd(III) gadofluorine 8 in the absence of -CD as a function of magnetic field and at T = 25 °C.  = 9.49 mmol dm-3

| **1H  / MHz** | ***r*1 /** mM**-1s-1** |
| --- | --- |
| 0.01 | 15.99 |
| 0.01 | 16.05 |
| 0.02 | 16.02 |
| 0.03 | 15.89 |
| 0.05 | 15.81 |
| 0.07 | 15.62 |
| 0.10 | 16.00 |
| 0.15 | 16.03 |
| 0.22 | 15.91 |
| 0.33 | 15.71 |
| 0.49 | 15.77 |
| 0.72 | 15.23 |
| 1.06 | 14.36 |
| 1.56 | 13.99 |
| 2.30 | 12.83 |
| 3.38 | 12.90 |
| 5.00 | 13.49 |
| 7.00 | 13.75 |
| 10.00 | 15.64 |
| 10.85 | 17.26 |
| 12.00 | 17.40 |
| 14.00 | 18.10 |
| 16.00 | 18.88 |
| 16.00 | 18.95 |
| 18.00 | 19.75 |
| 20.00 | 20.12 |
| 29.00 | 20.54 |
| 40.00 | 17.91 |
| 60.00 | 14.22 |
| 200.00 | 5.48 |

**Table S5.** Parameters obtained from the fitting of the 1H NMRD data for gadofluorine 8 in the absence and presence of 1 and 2 equivalents of -CD.[a]

| Parameters / species | micelles | Inclusion complex | |
| --- | --- | --- | --- |
| 1:1 | 2:1 |
| / ps | 5000  500 | 140  25 | 250  17 |
| / ps | 32  2 | 14  3 | 17  2 |
| *2* / 1020 s-2 | 0.11  0.01 | 0.8  0.2 | 0.40  0.05 |

[a]The distances between GdIII and either water protons in the inner sphere or the closest water protons of the outer sphere were respectively fixed at *rGdH*= 3.1 Å and *aGdH* = 3.5 Å. The coefficient of diffusion of water, , and the water exchange rate at 298.2 K, , have been fixed to common values *i.e.* = 23  10-10 m2 s-1 and = 1.2 106 s-1 (*kex* has been fixed at a usual value for GdIII-DO3A-monoamide complexes[11]).

**Table S6.** Dependence of the water proton relaxivity, *r1* (in mM-1s-1) of Gd(III) gadofluorine 8 on equivalent of -CD at 40 MHz and at T = 25 °C obtained by mixing a solution of micellar RF surfactant ( = 6.75 mmol dm-3) and a solution of -CD ( = 7.47 mmol dm-3)

| C-CD / CGd | R1p / CGd = *r1* (mM-1s-1) |
| --- | --- |
| 0.0 | 17.06 |
| 0.2 | 15.10 |
| 0.3 | 13.39 |
| 0.5 | 11.84 |
| 0.7 | 9.86 |
| 0.8 | 8.97 |
| 0.9 | 8.18 |
| 1.0 | 7.02 |
| 1.2 | 7.21 |
| 1.4 | 7.43 |
| 1.6 | 7.58 |
| 1.8 | 7.75 |
| 2.0 | 7.73 |
| 2.1 | 7.72 |
| 2.8 | 7.77 |
| 4.0 | 7.84 |
